# Supplementary material for: Seedling-Stage Deficit Irrigation with Nitrogen Application in Three-Year Field Study Provides Guidance for Improving Maize Yield, Water and Nitrogen Use Efficiencies
Source: MDPI journal article supplement (doi:10.3390/plants11213007), 2022-11-07
Supplement: s1 [file s1]

## Supplementary Materials

### **Seedling-Stage Deficit Irrigation with Nitrogen Application in Three-Year Field Study Provides Guidance for Improving Maize Yield, Water and Nitrogen Use Efficiencies**

**Yuxi Li <sup>1,2</sup>, Jian Chen <sup>1,2</sup>, Longbing Tian <sup>1,2</sup>, Zhaoyin Shen <sup>1,2</sup>, Daniel Buchvaldt Amby <sup>3,4</sup>, Fulai Liu <sup>3</sup>, Qiang Gao <sup>1,2</sup> and Yin Wang <sup>1,2,\*</sup>**

1 College of Resources and Environmental Sciences, Jilin Agricultural University, Changchun 130118, China

2 Key Laboratory of Straw Comprehensive Utilization and Black Soil Conservation, Ministry of Education Jilin Agricultural University, Changchun 130118, China

3 Department of Plant and Environmental Science, Faculty of Science, University of Copenhagen, Højbakkegaard Alle 13, 2630 Copenhagen Taastrup, Denmark

4 Department of Plant and Environmental Sciences, Section for Organismal Biology, Faculty of Science, University of Copenhagen, Thorvaldsensvej 40, 1871 Frederiksberg, Denmark

\* Correspondence: wangyin@jlau.edu.cn

**Table S1 Summary of ANOVA for the effects of seedling-stage soil water level, N fertilization and experimental year on shoot and root dry biomass (DM) and their ratio at different growth stages, grain yield and yield components of maize plants**

| Source of variation | Shoot DM |     |     |     | Root DM |     |     | Root: shoot ratio |     |    | Grain yield | Ear number | Grain number per ear | 100-grain weight |
|---------------------|----------|-----|-----|-----|---------|-----|-----|-------------------|-----|----|-------------|------------|----------------------|------------------|
|                     | BDI      | ADI | R1  | R6  | BDI     | ADI | R1  | BDI               | ADI | R1 |             |            |                      |                  |
| Water (W)           | —        | *** | ns  | ns  | —       | *** | ns  | —                 | ns  | ns | ns          | ***        | ns                   | ns               |
| Nitrogen (N)        | ***      | *** | *** | *** | ***     | *** | *** | ***               | *** | ns | ***         | ***        | ***                  | ***              |
| Year (Y)            | ***      | *** | *** | *** | ***     | *** | *** | ***               | ns  | ** | ***         | ***        | ***                  | ***              |
| W × N               | —        | ns  | ns  | ns  | —       | ns  | ns  | —                 | ns  | ns | ns          | *          | ns                   | ns               |
| W × Y               | —        | ns  | **  | **  | —       | **  | **  | —                 | *   | ns | **          | ns         | **                   | **               |
| N × Y               | ***      | ns  | ns  | ns  | ***     | ns  | ns  | ns                | ns  | ns | ns          | *          | ns                   | ns               |
| W × N × Y           | —        | ns  | ns  | ns  | —       | ns  | ns  | —                 | ns  | ns | ns          | ns         | ns                   | ns               |

DI, deficit irrigation; BDI, Before seedling-stage DI; ADI, After seedling-stage DI; R1, silking stage; R6, Maturity stage.

\*, \*\* and \*\*\* indicate significance at  $P < 0.05$ ,  $P < 0.01$  and  $P < 0.001$ , respectively, and ns indicates non-significance ( $P > 0.05$ ).

**Table S2 Summary of ANOVA for the effects of seedling-stage soil water level, N fertilization and experimental year on N uptake, N use efficiency (NUE), actual evapotranspiration (ETa) and water use efficiency (WUE) for shoot dry biomass (WUE<sub>dm</sub>) and grain yield (WUE<sub>gy</sub>) of maize plants at different growth stages**

| Source of variation | Plant N uptake |     |     |     | NUE |     | ETa |     |       |         | WUE <sub>dm</sub> / WUE <sub>gy</sub> |       |      |       |         |        |       |      |
|---------------------|----------------|-----|-----|-----|-----|-----|-----|-----|-------|---------|---------------------------------------|-------|------|-------|---------|--------|-------|------|
|                     | BDI            | ADI | R1  | R6  | BDI | ADI | R1  | R6  | S-BDI | BDI-ADI | ADI-R1                                | R1-R6 | S-R6 | S-BDI | BDI-ADI | ADI-R1 | R1-R6 | S-R6 |
| Water (W)           | —              | *** | ns  | ns  | —   | ns  | ns  | ns  | —     | ***     | *                                     | ns    | ***  | —     | ***     | ns     | ns    | *    |
| Nitrogen (N)        | ***            | *** | *** | *** | —   | —   | —   | —   | ns    | ns      | ns                                    | ns    | ns   | ***   | ***     | ***    | ***   | ***  |
| Year (Y)            | ***            | *** | *** | *** | *** | *** | *** | *** | ***   | ***     | ***                                   | ***   | ***  | *     | ns      | ***    | ***   | *    |
| W × N               | —              | ns  | ns  | ns  | —   | —   | —   | —   | —     | ns      | ns                                    | ns    | ns   | —     | ns      | ns     | ns    | ns   |
| W × Y               | —              | ns  | *   | *** | —   | **  | **  | *** | —     | **      | ns                                    | ns    | ns   | —     | **      | ns     | ns    | *    |
| N × Y               | ***            | ns  | *   | **  | —   | —   | —   | —   | ns    | ns      | ns                                    | ns    | ns   | ns    | ns      | ns     | ns    | ns   |
| W × N × Y           | —              | ns  | *   | *   | —   | —   | —   | —   | —     | ns      | ns                                    | ns    | ns   | —     | ns      | ns     | ns    | ns   |

S, sowing; DI, deficit irrigation; BDI, Before seedling-stage DI; ADI, After seedling-stage DI; R1, silking stage; R6, Maturity stage.

\*, \*\* and \*\*\* indicate significance at  $P < 0.05$ ,  $P < 0.01$  and  $P < 0.001$ , respectively, and ns indicates non-significance ( $P > 0.05$ ).

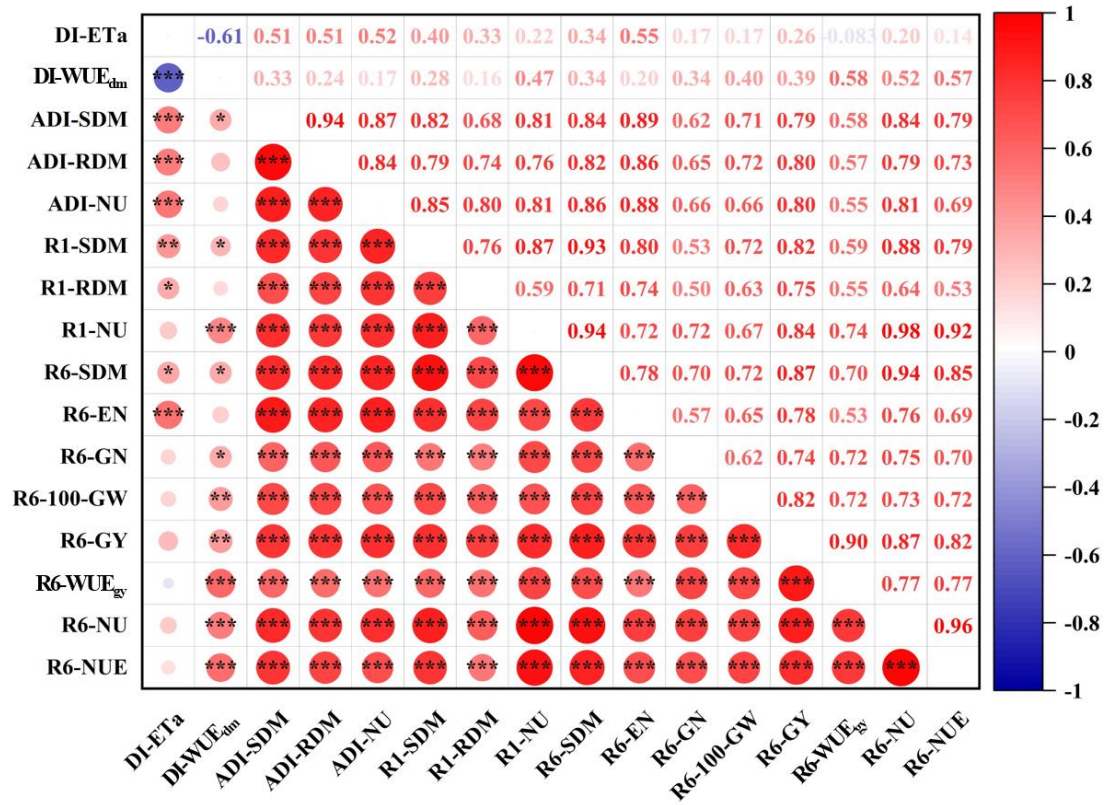

Figure S1 Correlations coefficients (upper triangular) and significant marks (lower triangular) among maize growth, water and N use parameters at different periods, respectively.

DI, deficit irrigation period; ADI, after seedling-stage DI; R1, silking stage; R6, maturity stage; ETa, actual evapotranspiration; SDM, shoot dry matter; RDM, root dry matter; NU, plant N uptake; NUE, N use efficiency; GY, grain yield; EN, ear number; GN, grain number per ear; 100-GW, 100-grain weight; WUE<sub>dm</sub> and WUE<sub>gy</sub>, water use efficiency for SDM and GY, respectively.

Significant mark \*, \*\* and \*\*\* indicate significance level at  $P < 0.05$ ,  $P < 0.01$  and  $P < 0.001$ , respectively.
